# Supplementary material for: Topical application of spent coffee ground extracts protects skin from ultraviolet B-induced photoaging in hairless mice
Source: Royal Society of Chemistry journal article supplement (doi:10.1039/c6pp00045b), 2016-05-10
Supplement: c6pp00045b1.pdf [file c6pp00045b1.pdf]

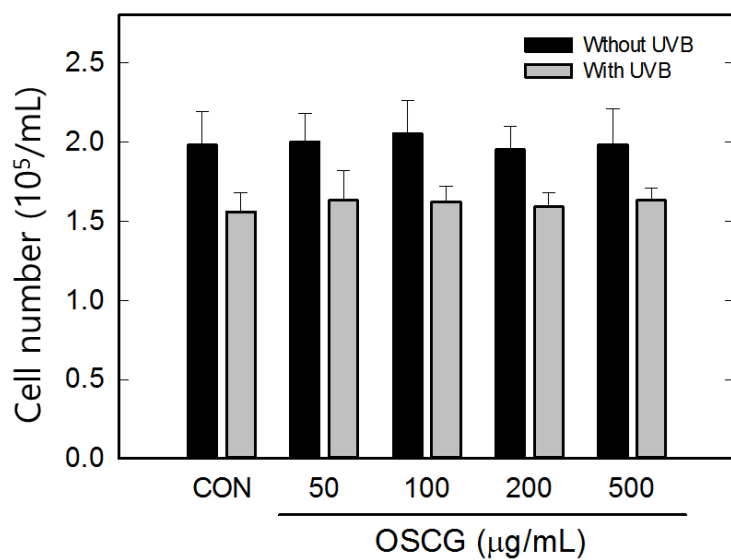

Fig.1S

HaCaT cells were harvested after 24 h-incubation with UVB-exposure or sample treatment, and stained with trypan blue. Stained viable cells were counted under a microscope.

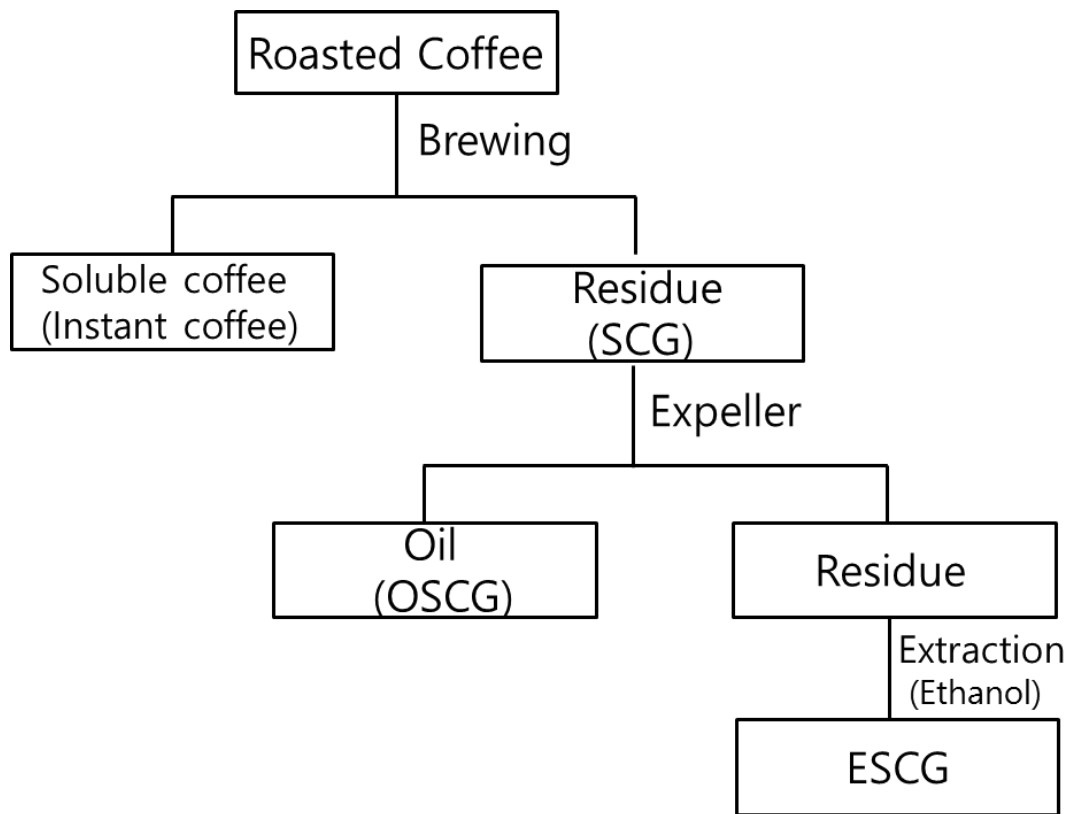

Fig.2S

Preparations of OSCG and ESCG from SCG

SCG: Spent coffee ground, OSCG: Oil of spent coffee ground, ESCG: Ethanol extract of spent coffee ground
