# Supplementary material for: Topical application of spent coffee ground extracts protects skin from ultraviolet B-induced photoaging in hairless mice
Source: Royal Society of Chemistry journal article supplement (doi:10.1039/c6pp00045b), 2016-05-10
Supplement: c6pp00045b2.pdf [file c6pp00045b2.pdf]

**Table 1S. Body weight gain and food intake of tested animals**

| Group   |      | Body weight (g)            |                            | Food intake (g/day)       |
|---------|------|----------------------------|----------------------------|---------------------------|
|         |      | Initial body weight        | Final body weight          |                           |
| Control | NC   | 22.87 ± 0.64 <sup>ns</sup> | 32.82 ± 0.30 <sup>ns</sup> | 4.03 ± 0.17 <sup>b</sup>  |
|         | UVBC | 23.18 ± 0.49 <sup>ns</sup> | 33.17 ± 0.98 <sup>ns</sup> | 4.01 ± 0.32 <sup>b</sup>  |
| Topical | BC   | 22.68 ± 1.06 <sup>ns</sup> | 33.00 ± 0.47 <sup>ns</sup> | 4.12 ± 0.08 <sup>b</sup>  |
|         | O    | 23.62 ± 0.62 <sup>ns</sup> | 33.54 ± 0.29 <sup>ns</sup> | 4.67 ± 0.15 <sup>a</sup>  |
|         | EL   | 22.76 ± 0.77 <sup>ns</sup> | 30.94 ± 0.48 <sup>ns</sup> | 4.26 ± 0.22 <sup>ab</sup> |
|         | EH   | 23.30 ± 0.67 <sup>ns</sup> | 33.28 ± 1.01 <sup>ns</sup> | 4.48 ± 0.12 <sup>ab</sup> |
|         | OEL  | 23.50 ± 0.64 <sup>ns</sup> | 32.08 ± 0.38 <sup>ns</sup> | 4.07 ± 0.06 <sup>b</sup>  |
|         | OEH  | 22.66 ± 0.20 <sup>ns</sup> | 32.36 ± 0.49 <sup>ns</sup> | 4.36 ± 0.09 <sup>b</sup>  |

Values are represented as mean ± SEM (n=5). Means with different letters in the same column indicate significant differences at p < 0.05 by Duncan's multiple range test. ns: not significant; NC: Normal Control; UVBC: UVB Control, BC; Base Control, O; Application of OSCG, EL; Low dosage application of ESCG, EH; High dosage application of ESCG, OEL; Low dosage application of OSCG (0.5%) and ESCG (0.1%), OEH; High dosage application of OSCG(0.5%) and ESCG(0.5%),

**Table 2S. Organ weight on hairless mice after 12 weeks of treatment**

| Group   |     | Organ weight (mg/100 g of body weight) |                           |                           |                           |
|---------|-----|----------------------------------------|---------------------------|---------------------------|---------------------------|
|         |     | Liver                                  | Kidney                    | Heart                     | Spleen                    |
| Control | NC  | 41.25 ± 0.45 <sup>ns</sup>             | 8.13 ± 0.15 <sup>ab</sup> | 6.26 ± 0.33 <sup>a</sup>  | 2.62 ± 0.09 <sup>b</sup>  |
|         | UVC | 42.37 ± 0.53 <sup>ns</sup>             | 7.81 ± 0.28 <sup>b</sup>  | 6.38 ± 0.20 <sup>a</sup>  | 2.95 ± 0.07 <sup>a</sup>  |
| Topical | BC  | 41.45 ± 0.68 <sup>ns</sup>             | 7.61 ± 0.15 <sup>b</sup>  | 6.09 ± 0.31 <sup>a</sup>  | 2.63 ± 0.13 <sup>b</sup>  |
|         | O   | 42.54 ± 0.67 <sup>ns</sup>             | 8.36 ± 0.17 <sup>a</sup>  | 6.33 ± 0.17 <sup>a</sup>  | 2.87 ± 0.10 <sup>a</sup>  |
|         | EL  | 41.63 ± 0.54 <sup>ns</sup>             | 7.99 ± 0.18 <sup>b</sup>  | 5.97 ± 0.22 <sup>ab</sup> | 2.75 ± 0.11 <sup>ab</sup> |
|         | EH  | 42.55 ± 0.89 <sup>ns</sup>             | 8.45 ± 0.17 <sup>a</sup>  | 5.79 ± 0.28 <sup>a</sup>  | 2.55 ± 0.12 <sup>b</sup>  |
|         | OEL | 41.13 ± 0.84 <sup>ns</sup>             | 8.09 ± 0.25 <sup>ab</sup> | 6.20 ± 0.10 <sup>ab</sup> | 2.73 ± 0.13 <sup>ab</sup> |
|         | OEH | 40.98 ± 1.18 <sup>ns</sup>             | 8.35 ± 0.24 <sup>a</sup>  | 5.70 ± 0.22 <sup>a</sup>  | 2.45 ± 0.12 <sup>b</sup>  |

Values are represented as mean ± SEM (n=5). Means with different letters in the same column indicate significant differences at  $p < 0.05$  by Duncan's multiple range test. ns: not significant; NC: Normal Control; UVBC: UVB Control, BC; Base Control, O; Application of OSCG, EL; Low dosage application of ESCG, EH; High dosage application of ESCG, OEL; Low dosage application of OSCG (0.5%) and ESCG (0.1%), OEH; High dosage application of OSCG(0.5%) and ESCG(0.5%),

**Table 3S. The fatty acid composition of OSCG**

| <b>Carbon no.</b>        | <b>Composition of fatty acid (%)</b> |
|--------------------------|--------------------------------------|
| Palmitic acid (C16:0)    | 36.51                                |
| Palmitoleic acid (C16:1) | 0.85                                 |
| Stearic acid (C18:0)     | 8.51                                 |
| Oleic acid (C18:1)       | 10.96                                |
| Linoleic acid (C18:2)    | 39.30                                |
| Linolenic acid (C18:3)   | 1.11                                 |
| Arachidonic acid(C20:4)  | 2.75                                 |
| SFA(%)                   | 45.02                                |
| MUFA(%)                  | 11.81                                |
| PUFA(%)                  | 43.16                                |
| P/S                      | 0.96                                 |
